# Supplementary material for: Simultaneous nitrate and sulfate biotransformation driven by different substrates: comparison of carbon sources and metabolic pathways at different C/N ratios
Source: Royal Society of Chemistry journal article supplement (doi:10.1039/d3ra02749j), 2023-01-01

Table. S1 Operation status and setup conditions of the reactor under different C/N

| Phase         | COD<br>(mg/L) | SO <sub>4</sub> <sup>2-</sup><br>(mg/L) | NO <sub>3</sub> <sup>-</sup><br>(mg/L) | C/N ratio<br>- | HRT<br>(h) |
|---------------|---------------|-----------------------------------------|----------------------------------------|----------------|------------|
| (day1-day20)  | 2350          | 930                                     | 460                                    | 8              | 24         |
| (day20-day40) | 1600          | 930                                     | 460                                    | 5              | 24         |
| (day40-day60) | 1000          | 930                                     | 460                                    | 3              | 24         |

Table. S2 Diversity indices analysis of the two activated sludge samples

| Sample\Estimators | sobs | shannon | ace    | chao   |
|-------------------|------|---------|--------|--------|
| Ra1               | 274  | 2.62    | 323.92 | 327.47 |
| Ra2               | 303  | 3.64    | 332.96 | 331.70 |
| Ra3               | 211  | 1.83    | 259.61 | 246.84 |
| Rb1               | 338  | 3.60    | 381.80 | 395.00 |
| Rb2               | 302  | 3.83    | 319.01 | 316.50 |
| Rb3               | 258  | 3.32    | 277.60 | 274.00 |

Table S3 level abundance table of metabolic pathways

| Pathway level 2                                  | Ra1     | Ra2     | Ra3     | Rb1     | Rb2     | Rb3     |
|--------------------------------------------------|---------|---------|---------|---------|---------|---------|
| <b>Amino Acid Metabolism</b>                     | 4459557 | 3760897 | 3848952 | 4942592 | 3940918 | 3922775 |
| <b>Carbohydrate Metabolism</b>                   | 3814239 | 3506845 | 3372168 | 4581178 | 3640107 | 3550184 |
| <b>Energy Metabolism</b>                         | 2541626 | 2057980 | 2466678 | 2743769 | 2053894 | 2248360 |
| <b>Lipid Metabolism</b>                          | 1513441 | 1206637 | 1356022 | 1624272 | 1353062 | 1370983 |
| <b>Nucleotide Metabolism</b>                     | 1507718 | 1200584 | 1190748 | 1520437 | 1174747 | 1185247 |
| <b>Xenobiotics Biodegradation and Metabolism</b> | 1069169 | 1146434 | 1451081 | 1381686 | 1275758 | 1353393 |
| <b>Glycan Biosynthesis and Metabolism</b>        | 875564  | 576639  | 822721  | 924050  | 539971  | 702191  |

Fig. S1 FAPROTAX function prediction

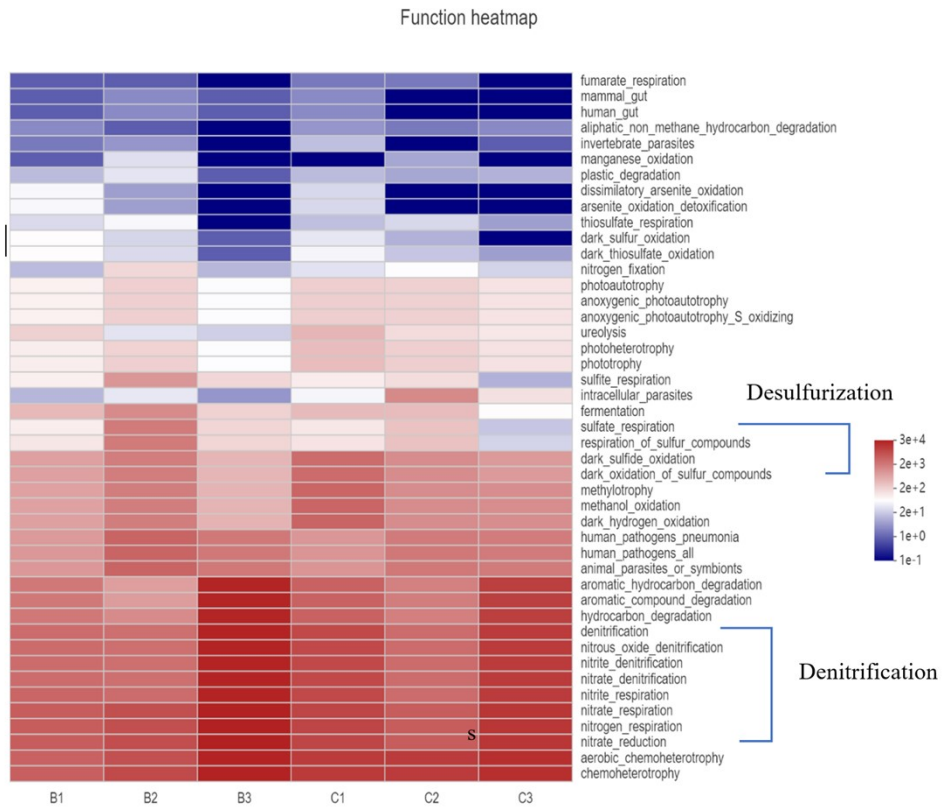

Supplement: d3ra02749j1.pdf [file d3ra02749j1.pdf]
